# 1           **Large-scale structural variation detection in subterranean clover** 2           **subtypes using optical mapping validated at nucleotide level**

3   **Yuxuan Yuan<sup>1, 2</sup>, Zbyněk Milec<sup>3</sup>, Philipp E. Bayer<sup>1, 2</sup>, Jan Vrána<sup>3</sup>, Jaroslav Doležel<sup>3</sup>, David**  
4   **Edwards<sup>1, 2</sup>, William Erskine<sup>2, 4</sup> and Parwinder Kaur<sup>2, 4, 5\*</sup>**

5   <sup>1</sup>School of Biological Sciences, The University of Western Australia, Perth, WA, Australia

6   <sup>2</sup>Institute of Agriculture, The University of Western Australia, Perth, WA, Australia

7   <sup>3</sup>Institute of Experimental Botany, Centre of the Region Haná for Biotechnological and Agricultural  
8   Research, Olomouc, Czech Republic

9   <sup>4</sup>Centre for Plant Genetics and Breeding, School of Agriculture and Environment, The University of  
10   Western Australia, Perth, WA, Australia

11   <sup>5</sup>Telethon Kids Institute, Perth, WA, Australia

12   **\* Correspondence:**

13   Dr. Parwinder Kaur

14   parwinder.kaur@uwa.edu.au

15   **Keywords: structural variation, optical mapping, BioNano, nucleotide validation, reference**

16   **Abstract**

17   Whole genome sequencing has been widely used to detect structural variations (SVs). However, the  
18   limited single molecule size makes it difficult to characterize large-scale SVs in a genome because  
19   they cannot fully cover such vast and complex regions. Recently, optical mapping in nanochannels

20 has provided novel resolution to detect large-scale SVs by comparing the physical location of the  
21 nickase recognition sequence in genomes. Other than in humans, SVs discovered in plants by optical  
22 mapping have not been validated. To assess the accuracy of SV calling in plants by optical mapping,  
23 we selected two genetically diverse subspecies of the *Trifolium* model species, subterranean clover  
24 cvs. Daliak and Yarloop. The SVs discovered by BioNano optical mapping (BOM) were validated  
25 using Illumina short reads. In the analysis, BOM identified 12 large-scale regions containing  
26 deletions and 19 containing insertions in Yarloop. The 12 large-scale regions contained 71 small  
27 deletions when validated by Illumina short reads. The results suggest that BOM could detect the total  
28 size of deletions and insertions, but it could not precisely report the location and actual quantity of  
29 SVs in the genome. Nucleotide-level validation is crucial to confirm and characterize SVs reported  
30 by optical mapping. The accuracy of SV detection by BOM is highly dependent on the quality of  
31 reference genomes and the density of selected nickases.

## 32 **1 Introduction**

33 Structural variations (SVs) are genomic alterations in sequence size, copy number, orientation or  
34 chromosomal location between individuals (Feuk et al., 2006). Usually, they are > 1kbp. SVs are  
35 important genetic features that enrich genetic diversity and lead to important phenotypes (Escaramis  
36 et al., 2015). Before the advent of molecular biology and DNA sequencing, SVs could only be  
37 characterized by cytogenetic analyses (Feuk et al., 2006). The consequent low throughput and low  
38 identification rate impeded the understanding of SVs (Saxena et al., 2014). Recently, an increasing  
39 number of studies on humans has shown that SVs contribute significantly to the generation of  
40 diseases (Feuk et al., 2006; Sharp et al., 2006; Stankiewicz and Lupski, 2010). Although studies of  
41 structural variation on plants has been increasing, challenges remain in the accuracy of SV detection.  
42 This is mainly due to the lack of high-quality reference genomes for large and complex plants  
43 (Saxena et al., 2014). It is difficult to assemble plant genomes using short sequence reads owing to

44 abundant repeats, polyploidy, and numerous pseudogenes in plant chromosomes (Yuan et al., 2017a).  
45 Commonly used short sequence reads cannot fully cover large and complex SV regions, leading a  
46 difficulty in large-scale SV detection.

47 Optical mapping in nanochannels, on the other hand, has provided a novel approach in genome  
48 assembly and large-scale SV calling (Cao et al., 2014). Contrasting with traditional DNA sequencing,  
49 optical mapping uses specific endonucleases to nick DNA strands, followed by fluorescent labelling  
50 and image capture to produce long, single molecule maps to reconstruct genome regions (Schwartz et  
51 al., 1993). The single molecule maps are >200 kbp on average, which is substantially longer than  
52 those DNA single molecules (typically 100 bp to 10 kbp) produced by commonly used DNA  
53 sequencing platforms such as Illumina and PacBio platforms (Yuan et al., 2017a).

54 By mapping the physical locations of nicking sites in reference and query genomes, optical mapping  
55 uses query genomes and/or consensus maps (similar to contigs in next generation sequencing, here  
56 there are consensus optical maps) to detect SVs by examining the physical location differences,  
57 orientation, and multi-alignments between coupled restriction sites. However, it is uncertain whether  
58 those detected SVs exist at a nucleotide level or are misreported due to the limited density of nicking  
59 sites. To address these concerns, we selected the *Trifolium* model species, subterranean clover  
60 (*Trifolium subterraneum* L.), with a high-quality reference and high-resolution BioNano optical maps  
61 (BOM) for two genetically diverse subspecies. These BOM findings were then validated by high  
62 coverage Illumina short read data generated for the two subtypes.

63 Subterranean clover is the key forage legume in Australia, producing valued feed for livestock on a  
64 sown area of more than 29 million hectares (Nichols et al., 2013). As with other legumes, symbiotic  
65 nitrogen fixation in subterranean clover contributes to soil improvement. Subterranean clover is  
66 diploid ( $2n = 2x = 16$ ) with a genome size around 556 Mb/1C. Its inbreeding nature, annual habit,

67 and well-assembled reference genome (*subterraneum*) have established it as a model for *Trifolium*  
68 (Nichols et al., 2013;Kaur et al., 2017). Based on morphology, genetic, and cytogenetic data,  
69 subterranean clover is classified into three subspecies: *subterraneum*, *yanninicum* and  
70 *brachycalycinum* (Katznelson and Morley, 1965a;b). The subspecies differ morphologically,  
71 enabling them to adapt to different soil environments, e.g. ssp. *subterraneum* and ssp. *yanninicum* are  
72 adapted to moderately acidic soils, with ssp. *subterraneum* found on well-drained soils and ssp.  
73 *yanninicum* adapted to water-enriched soils (Francis and Devitt, 1969). In contrast, ssp.  
74 *brachycalycinum* is adapted to dry and neutral-to-alkaline soils that contain cracks or stones  
75 facilitating burr development. In this study, we examined the sympatric subspecies *subterraneum* and  
76 *yanninicum* to check the performance of optical mapping in SV detection and validate the findings  
77 using short read sequencing.

## 78 **2 Material and Methods**

### 79 **2.1 Purification of cell nuclei**

80 Suspensions of intact cell nuclei were prepared following Vrána *et al.* (Vrana et al., 2016).  
81 Approximately 20 g each of mature dry seeds of ssp. *subterraneum* cultivar Daliak and ssp.  
82 *yanninicum* cultivar Yarloop were germinated at 25°C on moist paper towels in a dark environment.  
83 When the roots reached 2–3 cm in length, they were excised about 1 cm from the root tip, fixed in  
84 (2% v/v) formaldehyde at 5°C for 20 min, and subsequently washed three times with Tris buffer (5  
85 min each time). The root tips (~40/sample) were excised and transferred to 1 ml IB buffer (Šimková  
86 et al., 2003), in which cell nuclei were isolated using a homogenizer at 13,000 rpm for 18 s. Large  
87 debris was removed by filtering through 50-µm nylon mesh, and the nuclei in suspension were  
88 stained with DAPI (2 µg ml<sup>-1</sup>).

### 89 **2.2 Preparation of high molecular weight (HMW) DNA**

90 High molecular weight (HMW) DNA was prepared according to Šimková et al. (Šimková et al.,  
91 2003) with modifications. Four batches of 700,000 G1-phase nuclei each were sorted into 660 µl IB  
92 buffer in 1.5 ml polystyrene tubes using a FACSAria II SORP flow cytometer and sorter (BD  
93 Biosciences, San Jose, USA). One 20 µL agarose miniplug was prepared from each batch of nuclei.  
94 The miniplugs were treated by proteinase K (Roche, Basel, Switzerland), washed in wash buffer (10  
95 mM Tris, 50 mM EDTA, pH 8.0) four times, and subsequently five times in TE buffer (10 mM Tris,  
96 1 mM EDTA, pH 8.0). After the plugs had been melted for 5 min at 70°C and solubilized with  
97 GELase (Epicentre, Madison, USA) for 45 min, DNA was purified by drop dialysis against TE buffer  
98 (Merck Millipore, Billerica, USA) for 90 min.

### 99 **2.3 Construction of BioNano optical map**

100 The latest genome assembly of *T. subterraneum* (*cv.* Daliak) (Kaur et al., 2017) was used as a  
101 reference and digested *in silico* using Knickers (v1.5.5). Four available nickases (*Nt.BspQI*:  
102 GCTCTTC, *Nb.BbvCI*: CCTCAGC, *Nb.BsmI*: GAATGC, *Nb.BsrDI*: GCAATG) were used to check  
103 the frequency of enzyme restriction sites in the reference genome with *Nt.BspQI*, being the most  
104 appropriate enzyme to nick the HMW DNA with the expected frequency of 7.1 sites per 100 kbp. In  
105 all BioNano experiments, *Nt.BspQI* was used. The DNA was labeled and stained following the  
106 manufacturer's NLRS protocol as described in Kaur et al. (2017). Four runs on the BioNano Irys<sup>®</sup>  
107 instrument (30 cycles/run) were carried for subspecies *yannicum* (*cv.* Yarloop) to achieve sufficient  
108 genome coverage (~425X).

109 The dedicated BioNano IrysView (v2.5.1.29842), BioNano tools (v5122), BioNano scripts (v5134)  
110 and runBNG (Yuan et al., 2017b) were used to *de novo* assemble *cv.* Yarloop single molecule optical  
111 maps. Before *de novo* assembly, molecule quality was checked by running the 'Molecule Qlty Report  
112 (MQR)' in BioNano IrysView using *cv.* Yarloop raw BOM data and the digested reference genomes.

113 In the alignment parameter settings, the  $p$ -value ( $-T$ ) was set to  $1.81 \times 10^{-08}$  and the number of  
114 iterations ( $-M$ ) was set to 5. On receipt of the MQR, we adjusted the *de novo* assembly parameter  
115 settings from the default false positive density ( $-FP$ ) 1.5 to 1.67, default negative rate ( $-FN$ ) 0.15 to  
116 0.09, default scalingSD ( $-sd$ ) 0.0 to 0.25, default siteSD ( $-sf$ ) 0.2 to 0.15, and default initial assembly  
117  $p$ -value ( $-T$ )  $1 \times 10^{-9}$  to  $1.81 \times 10^{-08}$ .

#### 118 **2.4 Structural variation detection by BOM validated using Illumina short reads**

119 After *de novo* assembly, runBNG was used for SV calling. To check the accuracy of the SVs detected  
120 by BOM, we selected short paired-end reads for validation. The plants were grown in the field at  
121 Shenton Park, Western Australia (31°57' S, 115°50' E) and the genomic DNA was extracted from a  
122 single plant from each of the two *cv.* Yarloop and *cv.* Daliak of the subterranean clover subtypes.  
123 Truseq Illumina libraries were prepared with an insert size of approximately 550 bp and the short  
124 paired-end reads were generated using Illumina Hiseq 2000 at coverage of 48× in *cv.* Yarloop and  
125 56× in *cv.* Daliak (the same dataset used in (Kaur et al., 2017)). Reads from both cultivars were  
126 aligned to the latest nucleotide reference (*cv.* Daliak) respectively (Kaur et al., 2017) using BWA-  
127 MEM (v0.7.12) (Chiang et al., 2015). Results were visualized using the integrative genomics viewer  
128 (IGV) (v2.3.91) (Robinson et al., 2011). Nucleotide-level SV calling was performed using Lumpy  
129 (v0.2.11) (Layer et al., 2014) and Speedseq (v0.1.0) (Chiang et al., 2015). The settings of Speedseq  
130 were the default. The program used from Lumpy was 'lumpyexpress'. The nucleotide reference was  
131 the same one used in the BWA-MEM reads mapping. The short sequence reads of *cv.* Yarloop were  
132 the same as used in reads mapping. The SV calling was in the whole genome. With large-scale  
133 regions containing SVs from BOM identified, we checked the corresponding regions and see if those  
134 regions contain SVs from the result of Lumpy and the visualization of IGV.

### 135 **3 Results**

### 136 **3.1 *De novo* assembly of *cv. Yarloop* optical map**

137 A total of 1,083,671 single molecule maps (raw optical maps) was generated from the BioNano Irys  
138 platform with a total length of 235.5 GB (~425× genome coverage), of which the molecule N50 was  
139 212.7 kbp, and the average label density was 7.5 per 100 kbp (Table 1). After filtering out low-  
140 quality single molecule maps using the default setting (<150 kbp), 958,136 single molecule maps  
141 remained with a total length of 212.7 GB (~385× genome coverage), of which the molecule N50 was  
142 218.6 kbp, and the average label density was 8.3 per 100 kbp. Using the filtered single molecule  
143 maps, 375,975 single molecule maps were *de novo* assembled to each other to generate 377  
144 consensus maps. The total length of the generated consensus maps was 475 Mb (~89% of the total  
145 length of the reference genome) with a map N50 of 1.8 Mb.

### 146 **3.2 SVs assessment with BOM validated by Illumina short reads**

147 In the BioNano SV calling between *cv. Yarloop* BioNano molecule maps and the *cv. Daliak* reference  
148 genome, 12 large-scale regions (tens of kbp regions) containing deletions and 19 containing  
149 insertions were identified in *cv. Yarloop* (Supplementary Figure 1). The average length of the  
150 deletions in the 12 regions was estimated as 6.2 kbp (Supplementary Table S1) and, in these regions,  
151 9.7% of the sequences were assembly gaps (N's). Regarding insertions, the average length of the  
152 insertions was 8.04 kbp in the 19 regions, and the total percentage of unknown sequences in these  
153 insertion regions was 3.6%. The Lumpy SV calling detected 20,887 deletions, 115 inversions, and  
154 1,331 duplications in *cv. Yarloop* compared with the 71 detected deletions that supported the 12  
155 regions implied by BOM in *cv. Daliak* (Supplementary Figure 2 and Supplementary Table S2).  
156 Lumpy did not detect any insertions.

## 157 **4 Discussion**

158 BioNano single molecule maps are substantially longer than those produced by traditional  
159 sequencing methods, which means that BioNano single molecule maps can easily cover most of the  
160 large and complex genome regions that next generation sequence reads cannot span. In the *de novo*  
161 assembly of *cv. Yarloop* BioNano single molecule maps, the total length of the consensus maps  
162 accounted for ~89% of the estimated *T. subterraneum* genome size contrary to our expectation of  
163 ~100%. This incomplete assembly could be caused by the low-quality single molecule map filtering  
164 step or the single map fragmentation due to the close proximity of *Nt.BspQI* restriction sites leading  
165 to DNA double-strand breaks in some DNA regions (Hastie et al., 2013). These fragmented single  
166 molecule maps may collapse during *de novo* assembly causing assembly problems. Alternatively,  
167 some repetitive regions in *cv. Yarloop* might be longer than the length of BioNano single molecule  
168 maps which may have collapsed during *de novo* assembly.

169 By aligning consensus genome maps to a reference, BioNano Genomics uses a multiple local  
170 alignment algorithm to perform SV calling. SVs are detected as alignment outliers, which are defined  
171 by two well-aligned regions flanking poorly aligned or unaligned regions. To avoid false positive in  
172 SV calling, BioNano Genomics claims that the algorithm implemented in ‘runSV’ considering the  
173 non-normalised p-values of two well-aligned regions and the non-normalised log-likelihood ratio of  
174 the poorly aligned or unaligned regions. In the performance of SV calling reported by BioNano  
175 Genomics, when the effective coverage for a haplotype-sensitive assembly  $\geq 70$  X, the sensitive for  
176 homozygous insertions and deletions ( $\geq 1$  kbp) is over 98%. In this research, all SVs detected were  
177 larger than 1 kbp.

178 Lumpy is one of the most popular and reliable SV callers using short read sequencing to detect SVs.  
179 Different from other SV callers using one signal such as read-pair, split-read, read-depth and prior  
180 knowledge, to detect SVs, Lumpy integrates multiple SV signals and uses a probabilistic framework  
181 to increase the sensitivity in SV calling (Layer et al., 2014). In the Lumpy SV calling, we identified



182 71 small deletions in the 12 large-scale regions reported by BOM. While, the total length of the 71  
183 deleted genomic regions reported by Lumpy was close to the total length reported by BOM (71.7 kbp  
184 vs. 74.4 kbp respectively), some length differences remained, probably due to the incorrect gap size  
185 or misassemblies in the reference genome, or also could be due to the incomplete SV calling in  
186 Lumpy. Interestingly, the gaps in the detected SV regions which were highly likely caused by  
187 collapse in the repetitive regions, was complemented by BioNano super-scaffolding process for the  
188 generation of the advanced reference assembly (Kaur et al., 2017).

189 No insertions were reported by Lumpy in the SV calling, probably those sequences being novel in *cv.*  
190 Yarloop compared to the reference assembly based on the *cv.* Daliak. When nucleotide level  
191 alignments were carried out using short sequence reads from the *cv.* Yarloop with the *cv.* Daliak,  
192 Yarloop reads from genomic regions not present in the reference assembly, either being Yarloop-  
193 specific or unassembled in the reference could not map. As such, SV could not be called in these  
194 regions. Those novel sequences were grouped as unmapped sequences, earlier abandoned by Lumpy  
195 in SV calling. This issue has also been reported previously by Xia *et al.* (Xia et al., 2016) for most  
196 reference based SV calling methods, which cannot efficiently report large-scale insertions if there are  
197 many novel sequences in the examined individuals.

198 In terms of SV calling, in this study BOM identified fewer SVs than those reported by Lumpy using  
199 whole genome sequencing (Figure 1). The location of SVs detected by BOM is only approximate.  
200 The precise location of SVs inside the reported regions is uncertain in the absence of other long range  
201 sequencing data. Although BOM can report the size of SVs, owing to the density of enzyme  
202 restriction sites in the range of 10 kbp, the size is more likely a size aggregation of several small  
203 deletions (see SV size comparison between SVs called by BOM and Illumina short reads in  
204 Supplementary Figure 2. Small deletions are those DNA regions with a length from few base pair to  
205 few hundred base pair). Incorrectly placed/oriented contigs/scaffolds and incorrect estimates of gap

206 sizes between contigs can also affect SV detection in optical mapping, particularly for deletion and  
207 insertion, as it is based on the recognition site of the nickase(s) used.. Inaccurate gap size has a high  
208 probability to call false positive SVs. Gap regions may contain enzyme restriction sites that cannot be  
209 represented in the reference genome, leading to mismatches or missing reports of SVs. Furthermore,  
210 misassemblies can confound the alignment of enzyme restriction sites between maps and report false  
211 positive SVs. Clearly, a high-quality reference genome is crucial in the discovery of SVs in BOM.

## 212 **5 Conclusions**

213 Based on the physical location of nicking sites, optical mapping provides an attractive method to  
214 detect SVs. Single molecule maps produced by optical mapping are long enough to span most of the  
215 large and complex genome regions that traditional sequencing technologies are unable to achieve.  
216 However, optical mapping has some limitations in discovering the precise location and actual number  
217 of SVs owing to enzyme physical locations. NGS is useful to characterise SVs identified by optical  
218 mapping.

219 Although optical mapping provides the total size of SVs in a detected region, the total size of those  
220 SVs can be misreported due to the inaccurate gap size in the reference genome and/or absent enzyme  
221 restriction site information in the gap regions. To improve SV detection and characterization, a high-  
222 quality reference genome is crucial. In the absence of a high-quality reference genome, possible  
223 nucleotide-level validation of those identified SV regions is recommended to assess the accuracy of  
224 SV calling in optical mapping.

## 225 **6 Abbreviations**

226 BOM: BioNano optical mapping; DNA: deoxyribonucleic acid; MQR: molecule quality report; N/A:  
227 not available; NGS: next generation sequencing; SNP: single-nucleotide polymorphism; SV:  
228 structural variation

## 229 **7 Acknowledgments**

230 YY is supported by the China Scholarship Council for his PhD studies at the University of Western  
231 Australia. We thank Zdeňka Dubská for assistance with nuclei flow sorting, Helena Staňková for  
232 help with BioNano mapping, and Hana Šimková for advice on BioNano mapping. We acknowledge  
233 the supercomputing resources provided by the Pawsey Supercomputing Centre with funding from the  
234 Australian Government and the Government of Western Australia.

## 235 **8 Author Contributions**

236 KP, ED, BP and YY conceived and designed the research. MZ, VJ and DJ performed the BioNano  
237 Irys<sup>®</sup> System genome mapping experiments. YY performed the bioinformatics analysis, prepared the  
238 figures and wrote the manuscript with contributions from KP, BP, MZ, EW, ED, DJ and VJ. All  
239 authors read and approved this manuscript.

## 240 **9 Conflict of interest**

241 The authors declare that they have no competing interests.

## 242 **10 Funding**

243 This study was conducted by the Centre for Plant Genetics and Breeding (PGB) at The University of  
244 Western Australia (UWA) in close collaboration with Institute of Experimental Botany, Centre of the  
245 Region Haná for Biotechnological and Agricultural Research, Czech Republic. This project was also

246 supported by grant award LO1204 from the National Program of Sustainability I and by the Czech  
247 Science Foundation (award no. P501/12/G090).

## 248 **11 Availability of Data**

249 All raw nucleotide data and BioNano data are under BioProject PRJNA404013.

## 250 **12 Supplementary Material**

251 The supplementary Material for this article can be found in the Supplementary Material for Frontiers.

252

253 **References:**

- 254 Cao, H., Hastie, A.R., Cao, D., Lam, E.T., Sun, Y., Huang, H., Liu, X., Lin, L., Andrews, W., Chan,  
255 S., Huang, S., Tong, X., Requa, M., Anantharaman, T., Krogh, A., Yang, H., Cao, H., and Xu,  
256 X. (2014). Rapid detection of structural variation in a human genome using nanochannel-  
257 based genome mapping technology. *Gigascience* 3, 34.
- 258 Chiang, C., Layer, R.M., Faust, G.G., Lindberg, M.R., Rose, D.B., Garrison, E.P., Marth, G.T.,  
259 Quinlan, A.R., and Hall, I.M. (2015). SpeedSeq: ultra-fast personal genome analysis and  
260 interpretation. *Nat. Methods* 12, 966-968.
- 261 Escaramis, G., Docampo, E., and Rabionet, R. (2015). A decade of structural variants: description,  
262 history and methods to detect structural variation. *Brief Funct. Genomics* 14, 305-314.
- 263 Feuk, L., Carson, A.R., and Scherer, S.W. (2006). Structural variation in the human genome. *Nat.*  
264 *Rev. Genet.* 7, 85-97.
- 265 Francis, C., and Devitt, A. (1969). The effect of waterlogging on the growth and isoflavone  
266 concentration of *Trifolium subterraneum* L. *Aust. J. Agric. Res.* 20, 819-825.
- 267 Hastie, A.R., Dong, L., Smith, A., Finklestein, J., Lam, E.T., Huo, N., Cao, H., Kwok, P.Y., Deal,  
268 K.R., Dvorak, J., Luo, M.C., Gu, Y., and Xiao, M. (2013). Rapid genome mapping in  
269 nanochannel arrays for highly complete and accurate de novo sequence assembly of the  
270 complex *Aegilops tauschii* genome. *PLoS One* 8, e55864.
- 271 Katznelson, J., and Morley, F.H.W. (1965a). Speciation processes in *Trifolium subterraneum* L. *Isr.*  
272 *J. Bot.* 14, 15-35.
- 273 Katznelson, J., and Morley, F.H.W. (1965b). A taxonomic revision of sect *Calycomorphum* of the  
274 genus *Trifolium*. 1. The geocarpic species. *Isr. J. Bot.* 14, 112-134.
- 275 Kaur, P., Bayer, P.E., Milec, Z., Vrana, J., Yuan, Y., Appels, R., Edwards, D., Batley, J., Nichols, P.,  
276 Erskine, W., and Dolezel, J. (2017). An advanced reference genome of *Trifolium*  
277 *subterraneum* L. reveals genes related to agronomic performance. *Plant Biotechnol. J.* 15,  
278 1034-1046.
- 279 Layer, R.M., Chiang, C., Quinlan, A.R., and Hall, I.M. (2014). LUMPY: a probabilistic framework  
280 for structural variant discovery. *Genome Biol* 15, R84.
- 281 Nichols, P.G.H., Foster, K.J., Piano, E., Pecetti, L., Kaur, P., Ghamkhar, K., and Collins, W.J.  
282 (2013). Genetic improvement of subterranean clover (*Trifolium subterraneum* L.). 1.  
283 Germplasm, traits and future prospects. *Crop Pasture Sci.* 64, 312-346.
- 284 Robinson, J.T., Thorvaldsdottir, H., Winckler, W., Guttman, M., Lander, E.S., Getz, G., and Mesirov,  
285 J.P. (2011). Integrative genomics viewer. *Nat. Biotechnol.* 29, 24-26.
- 286 Saxena, R.K., Edwards, D., and Varshney, R.K. (2014). Structural variations in plant genomes. *Brief*  
287 *Funct. Genomics* 13, 296-307.
- 288 Schwartz, D.C., Li, X., Hernandez, L.I., Ramnarain, S.P., Huff, E.J., and Wang, Y.K. (1993).  
289 Ordered restriction maps of *Saccharomyces cerevisiae* chromosomes constructed by optical  
290 mapping. *Science* 262, 110-114.
- 291 Sharp, A.J., Cheng, Z., and Eichler, E.E. (2006). Structural variation of the human genome. *Annu.*  
292 *Rev. Genomics Hum. Genet.* 7, 407-442.

- 293 Šimková, H., Číhalíková, J., Vrána, J., Lysák, M.A., and Doležel, J. (2003). Preparation of HMW  
294 DNA from Plant Nuclei and Chromosomes Isolated from Root Tips. *Biol. Plant.* 46, 369–373.
- 295 Stankiewicz, P., and Lupski, J.R. (2010). Structural variation in the human genome and its role in  
296 disease. *Annu. Rev. Med.* 61, 437-455.
- 297 Vrana, J., Capal, P., Cihalikova, J., Kubalaková, M., and Dolezel, J. (2016). Flow Sorting Plant  
298 Chromosomes. *Methods Mol. Biol.* 1429, 119-134.
- 299 Xia, L.C., Sakshuwong, S., Hopmans, E.S., Bell, J.M., Grimes, S.M., Siegmund, D.O., Ji, H.P., and  
300 Zhang, N.R. (2016). A genome-wide approach for detecting novel insertion-deletion variants  
301 of mid-range size. *Nucleic Acids Res.* 44, e126.
- 302 Yuan, Y., Bayer, P.E., Batley, J., and Edwards, D. (2017a). Improvements in Genomic Technologies:  
303 Application to Crop Genomics. *Trends Biotechnol.* 35, 547-558.
- 304 Yuan, Y., Bayer, P.E., Lee, H.T., and Edwards, D. (2017b). runBNG: a software package for  
305 BioNano genomic analysis on the command line. *Bioinformatics* 33, 3107-3109.
- 306

307 **Table 1. Statistics of *cv.* Yarloop BioNano optical maps**

| <b>Subject</b>                             | <b>Raw BioNano data</b> | <b>Filtered BioNano data</b> | <b>Assembled BioNano data</b> |
|--------------------------------------------|-------------------------|------------------------------|-------------------------------|
| <b>Number of molecules</b>                 | 1,083,671               | 958,136                      | 375,975                       |
| <b>Number of consensus maps</b>            | N/A                     | N/A                          | 377                           |
| <b>Total length</b>                        | 235.5 Gb                | 212.7 Gb                     | 475.2 Mb                      |
| <b>N50<sup>□</sup></b>                     | 212.7 kbp               | 218.6 kbp                    | 1.8 Mb                        |
| <b>Average of label density (/100 kbp)</b> | 7.5                     | 8.3                          | N/A                           |
| <b>Coverage</b>                            | 425                     | 385                          | 0.89                          |

308 <sup>□</sup>In the set of molecules, N50 represents the length of the shortest molecule whose length is greater  
309 than half of the total sum of lengths of all molecules; it is the point of half of the mass of the  
310 distribution

311

312 **Figure 1:** An example of deletions detected by BioNano optical mapping with nucleotide sequences  
313 validation. The region reported by BioNano contains deletion(s) in *cv.* Yarloop compared to the  
314 reference genome between location 25,435,990 bp and 25,530,870 bp in chromosome 2. The grey  
315 bars in this figure represent short reads aligned to the reference. Other color dots mean different  
316 SNPs. Nt.BspQI forward represents sequence: GCTCTTC and Nt.BspQI reverse represents sequence:  
317 GAAGAGC. The size of the deletion reported by BioNano is 6.6 kbp. From the nucleotide-level  
318 validation, eight small deletions (displayed as 'del') were visualized in the IGV with no sequence  
319 reads aligned to the reference genome. The total size of those eight small deletions is 6.1 kbp. The  
320 eight small regions were supported in the Lumpy SV calling.

321

Yarloop BNG map

TSs\_v2.0

Chr2: 25,435,990-25,530,870

94 Kb

Daliak

Yarloop

Nt.BspQI forward  
Nt.BspQI reverse

bioRxiv preprint doi: <https://doi.org/10.1101/232132>; this version posted December 11, 2017. The copyright holder for this preprint (which was not certified by peer review) is the author/funder, who has granted bioRxiv a license to display the preprint in perpetuity. It is made available under aCC-BY-NC-ND 4.0 International license.

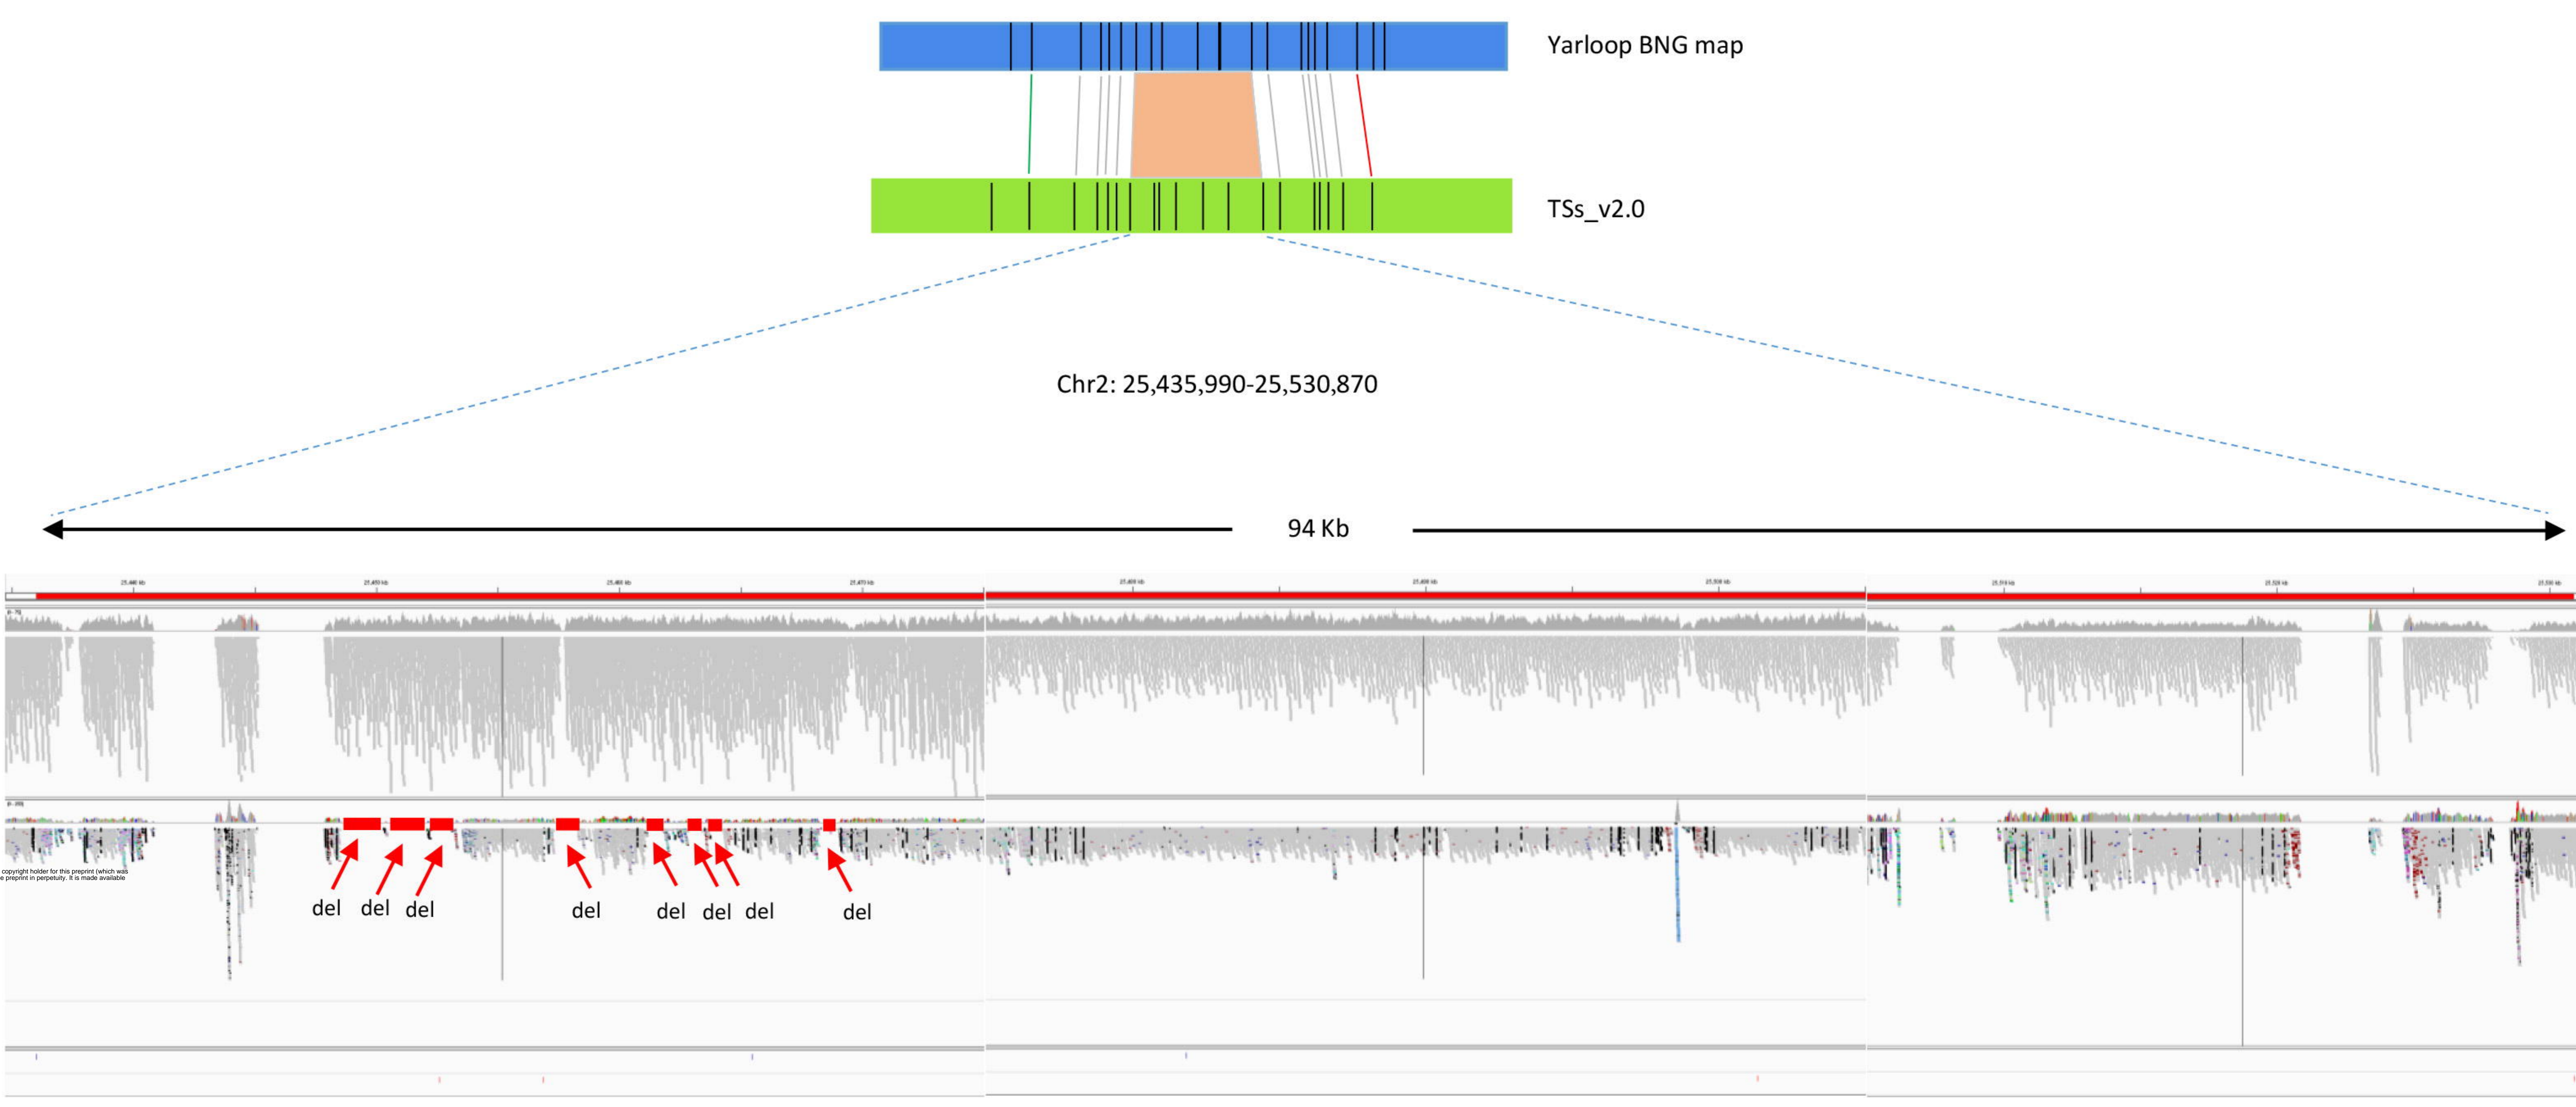

Source: http://biorxiv.org/content/10.1101/232132v1.full.pdf
